# Supplementary material for: Self-assembled foam-like graphene networks formed through nucleate boiling
Source: PubMed Central journal article supplement — Sci Rep. 2013 Mar 7;3:1396. doi: 10.1038/srep01396 (PMC3590561; doi:10.1038/srep01396), 2013-03-07
Supplement: srep01396-s1.pdf [file srep01396-s1.pdf]

# Supplementary Information

## Self-assembled foam-like graphene networks formed by nucleate boiling

*Ho Seon Ahn<sup>1,†</sup>, Ji-Wook Jang<sup>2,†</sup>, Minsu Seol<sup>2</sup>, Ji Min Kim<sup>3</sup>, Dong-Jin Yun<sup>4</sup>, Chibeom Park<sup>5</sup>, Hyungdae Kim<sup>6</sup>, Duck Hyun Youn<sup>2</sup>, Jae Young Kim<sup>2</sup>, Gunyeop Park<sup>3</sup>, Su Cheong Park<sup>3</sup>, Jin Man Kim<sup>7</sup>, Dong In Yu<sup>3</sup>, Kijung Yong<sup>2</sup>, Moo Hwan Kim<sup>7,3\*</sup> and Jae Sung Lee<sup>7,2\*</sup>*

<sup>1</sup>Division of Mechanical Engineering, University of Incheon, Incheon, 406-772, Republic of Korea

<sup>2</sup>Department of Chemical Engineering, POSTECH, Pohang, 790-784, Republic of Korea

<sup>3</sup>Department of Mechanical Engineering, POSTECH, Pohang, 790-784, Republic of Korea

<sup>4</sup>Analytical Engineering Laboratory of Samsung Advanced Institute of Technology,

PO Box 111, 440-600, Republic of Korea

<sup>5</sup>Department of Chemistry, POSTECH, Pohang, 790-784, Republic of Korea

<sup>6</sup>Department of Nuclear Engineering, Kyung Hee University, Youngin, 446-701, Republic of Korea

<sup>7</sup>Division of Advanced Nuclear Engineering, POSTECH, Pohang, 790-784, Republic of Korea

*†These authors equally contributed to this work.*

# Contents

## **Supplementary Figure 1**

AFM image of RGO.

## **Supplementary Figure 2 and Table 1**

XPS peak deconvolution of GO, RGO and SFG.

## **Supplementary Figure 3**

Surface wettability test.

## **Supplementary Figure 4**

Side-view HRSEM image of the SFG structure.

## **Supplementary Figure 5**

High speed visualization and infrared radiography of bubble generation, growth, and departure.

## **Supplementary Figure 6**

A proposed mechanism of the SFG structure formation.

## **Supplementary Figure 7**

An experimental evidence of BGL and SFG formation mechanism.

## **Supplementary Figure 8**

A schematic of SFG preparation process.

## **Supplementary Figure 9**

A nucleate boiling experimental facility.

## **Supplementary Table 2**

Raman parameters of GO, RGO and SFG.

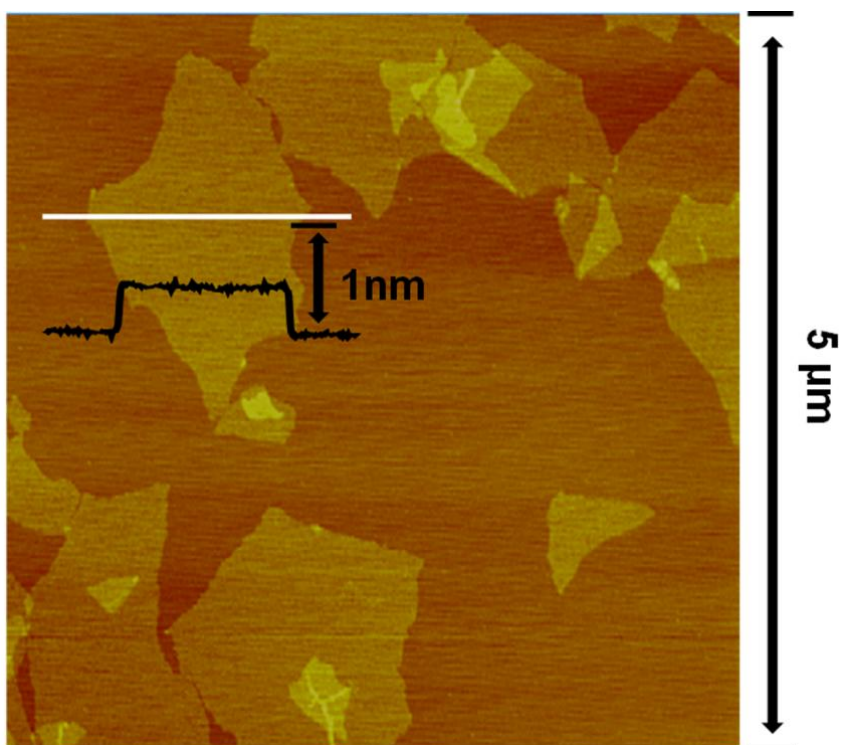

Supplementary Figure S1 | AFM image of RGO

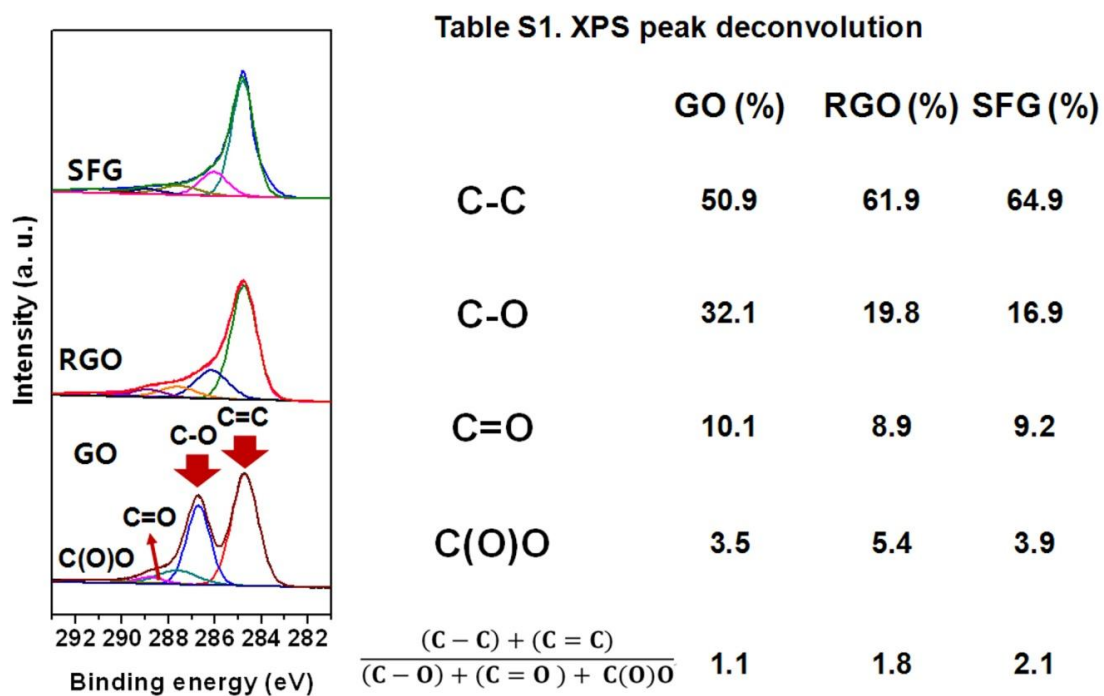

Supplementary Figure S2 | XPS peak deconvolution of GO, RGO and SFG

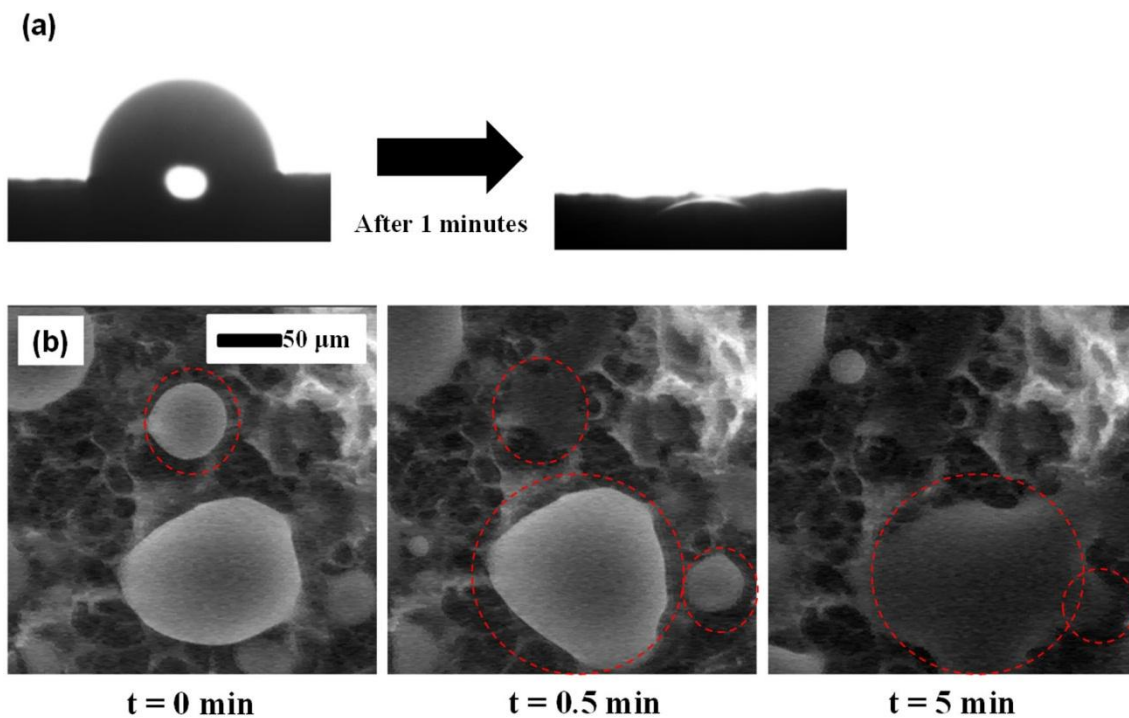

**Supplementary Figure S3 | Surface wettability test on SFG** (a) Contact angle measurement : When a 10  $\mu\text{L}$  water droplet was loaded, it was absorbed into the pores of SFGs. (b) The dynamic observation of water droplet absorption into the SFG using E-SEM under the 30  $^{\circ}\text{C}$  and 0.6 bar. Water droplets were suddenly absorbed (see the red-dot circle).

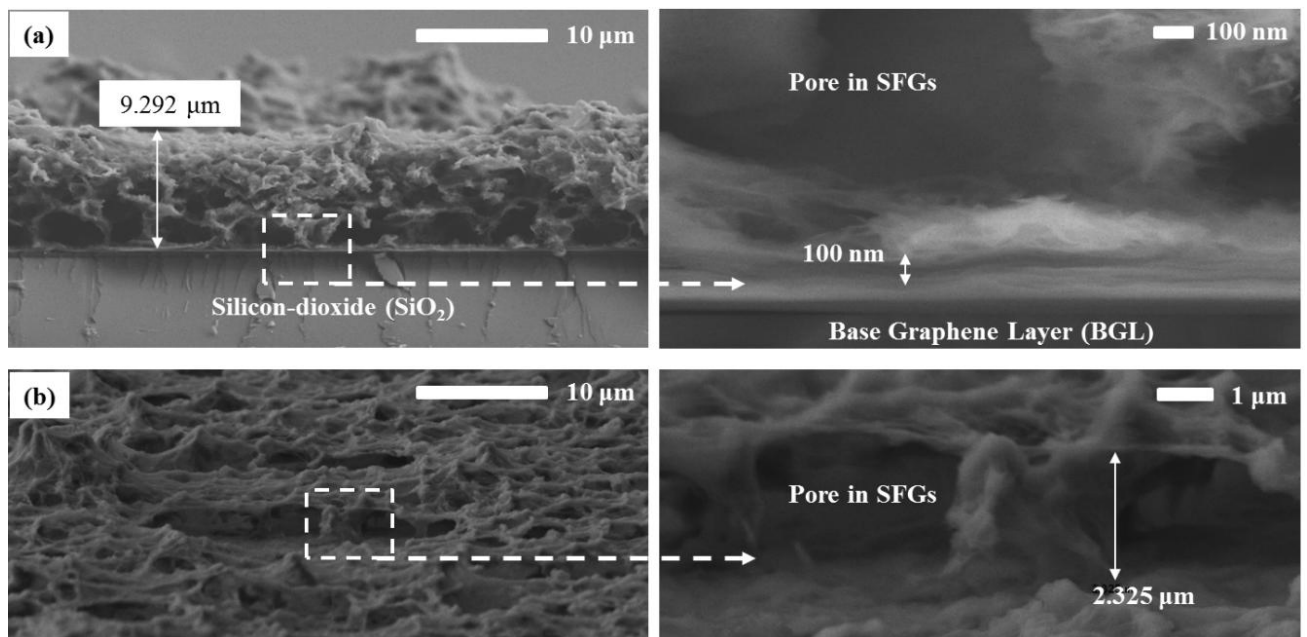

**Supplementary Figure S4 | Side-view HRSEM image of the 3-D SFG structure.** (a) The thickness of SFG film and BGL. (b) The pore size of SFG film (25 $^{\circ}$  tilt view).

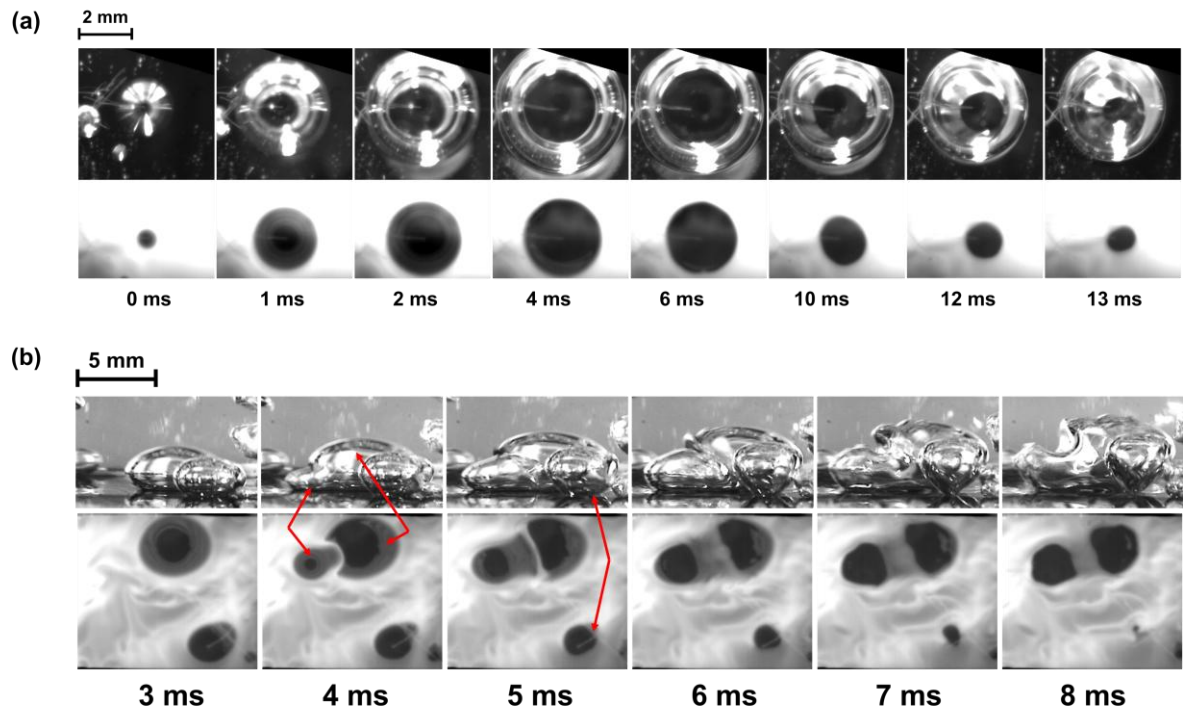

**Supplementary Figure S5 | High speed visualization and infrared radiography of bubble generation, growth, and departure** (a) Triple line movement of the single bubble. (Black circle of 2<sup>nd</sup> row images shows the triple line movement.) (b) Local vacancy during the bubbles coalescence. (white line between black circles)

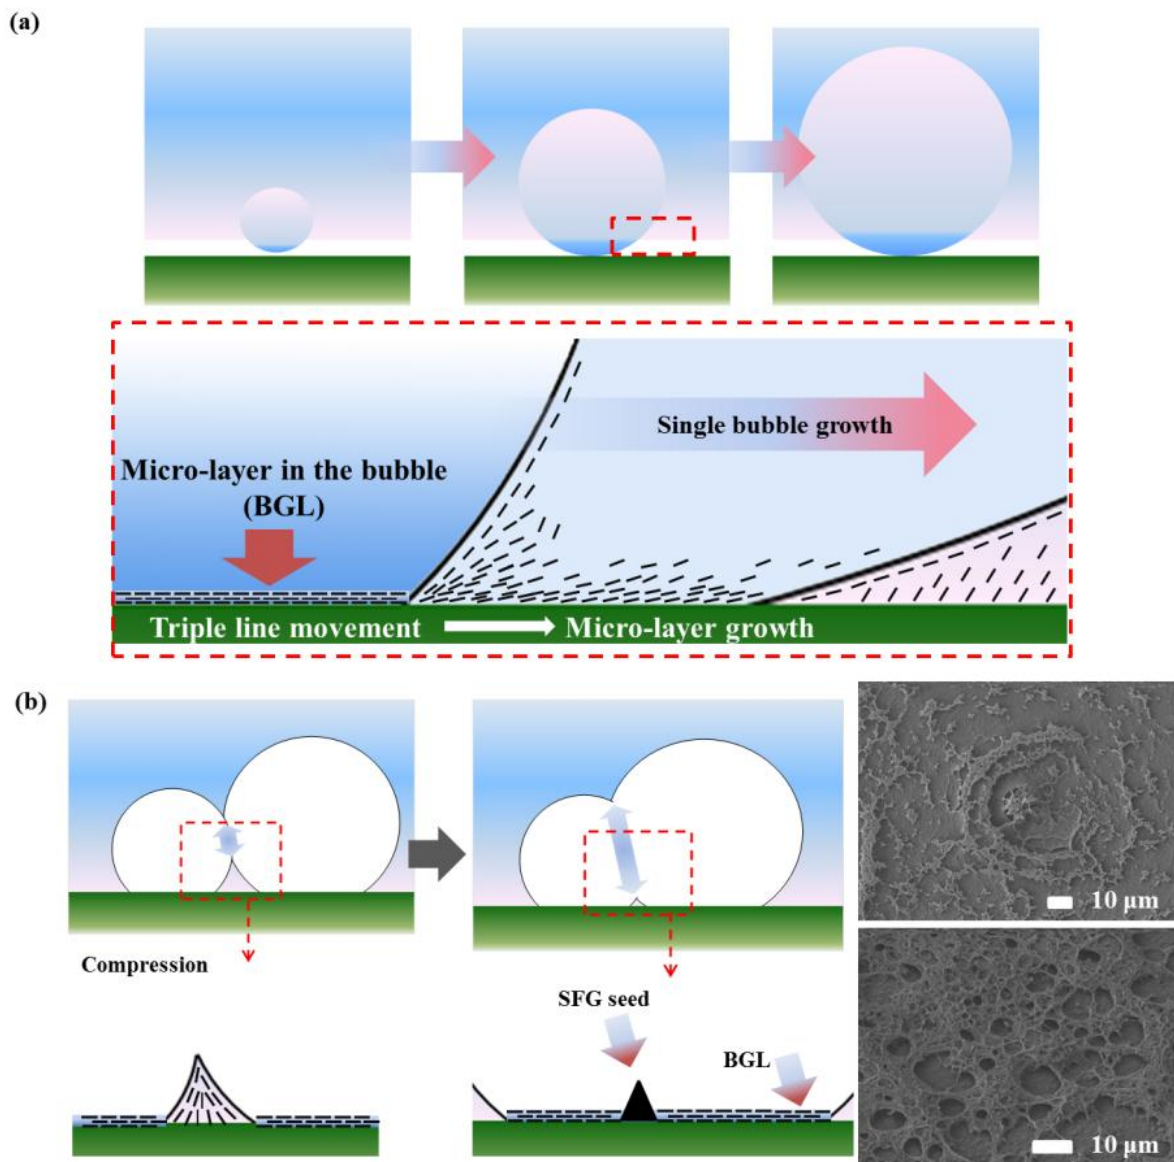

**Supplementary Figure 6 | A proposed mechanism of the SFG structure formation.** (a) Mechanism of the BGL structure formation. (b) Mechanism of SFG seed formation.

100 kW/m<sup>2</sup>

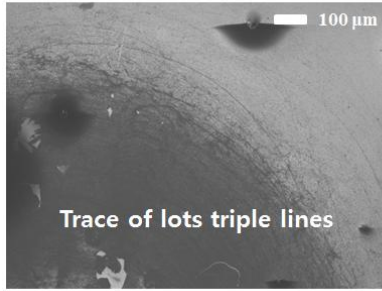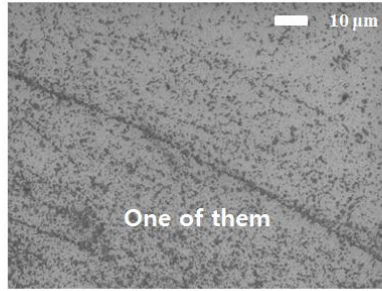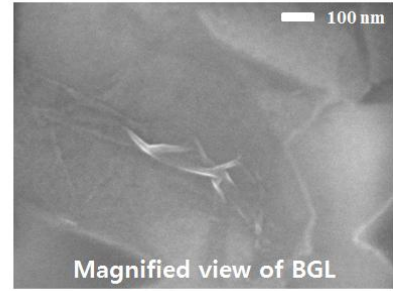

200 kW/m<sup>2</sup>

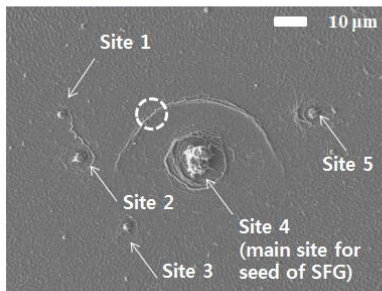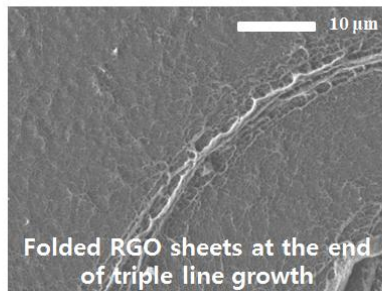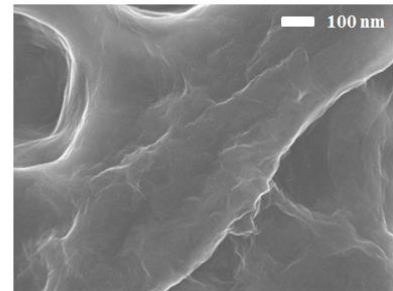

400 kW/m<sup>2</sup>

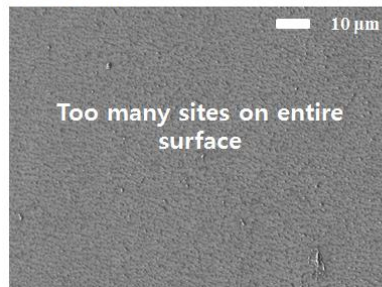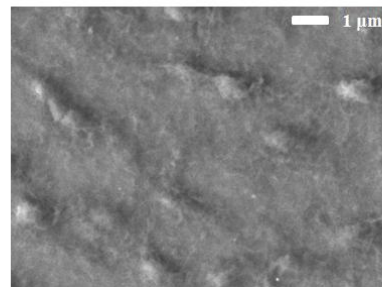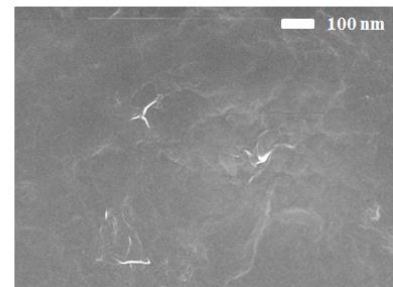

**Supplementary Figure 7 | An experimental evidence of BGL and SFG formation mechanism.** Observation of BGL and SFG formation process, which supports the proposed mechanism discussed in the text.

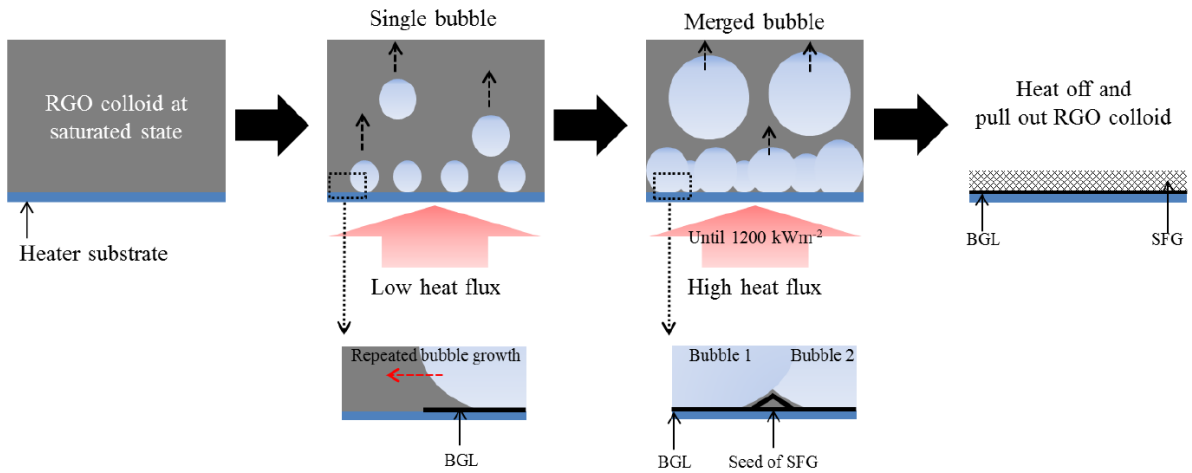

**Supplementary Figure 8 | A simple schematic of SFG preparation process.**

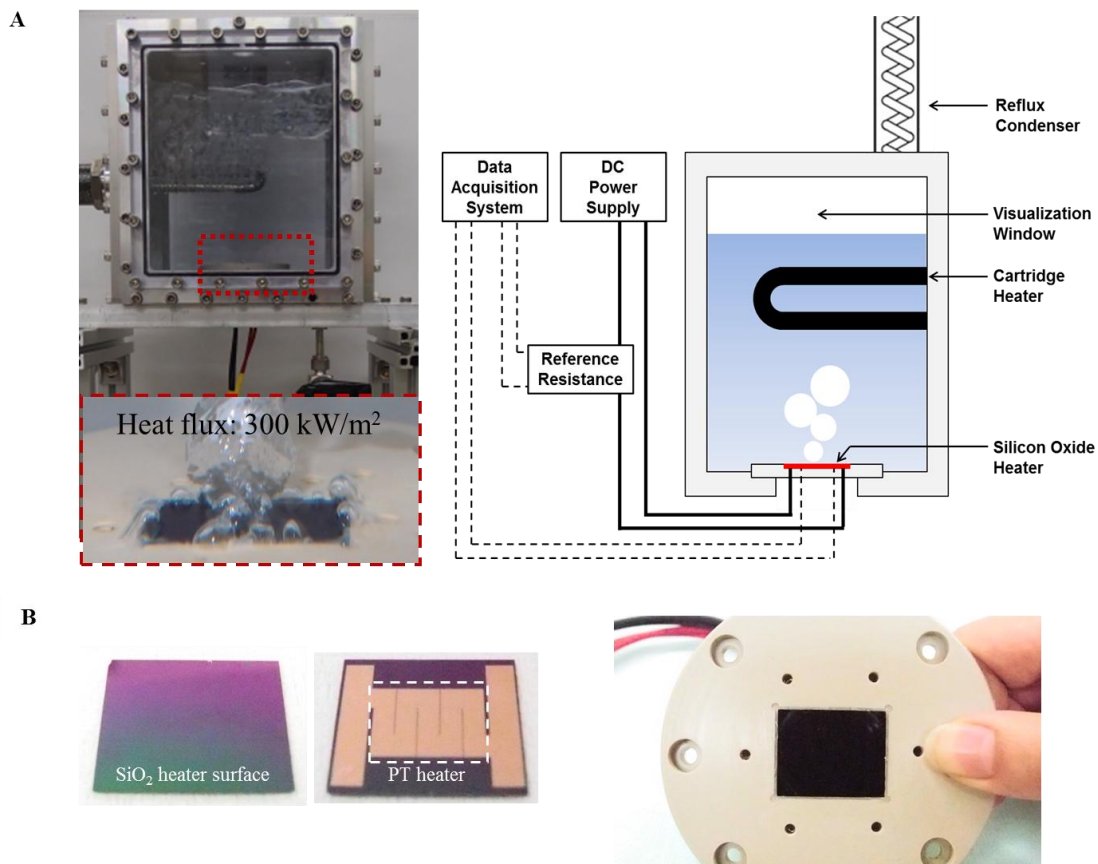

**Supplementary Figure 9 | A nucleate boiling experimental facility.** (a) The boiling experimental facility and a picture of bubbles formation on the silicon. (b) Silicon-dioxide heater with  $25 \times 20 \text{ mm}$ . The backside of the heater was patterned with Pt material for the electrical joule heating.



**Supplementary Table 2 | Raman parameters of GO, RGO and SFG**

| Sample | Raman parameters |       |           |
|--------|------------------|-------|-----------|
|        | $I_D$            | $I_G$ | $I_D/I_G$ |
| GO     | 0.88             | 1     | 0.88      |
| RGO    | 1                | 0.86  | 1.16      |
| SFG    | 1                | 0.70  | 1.43      |
